# Supplementary material for: Doxorubicin Inhibits Phosphatidylserine Decarboxylase and Modifies Mitochondrial Membrane Composition in HeLa Cells
Source: Int J Mol Sci. 2020 Feb 15;21(4):1317. doi: 10.3390/ijms21041317 (PMC7072979; doi:10.3390/ijms21041317)
Supplement: Supplementary file 1 [file ijms-21-01317-s001.pdf]

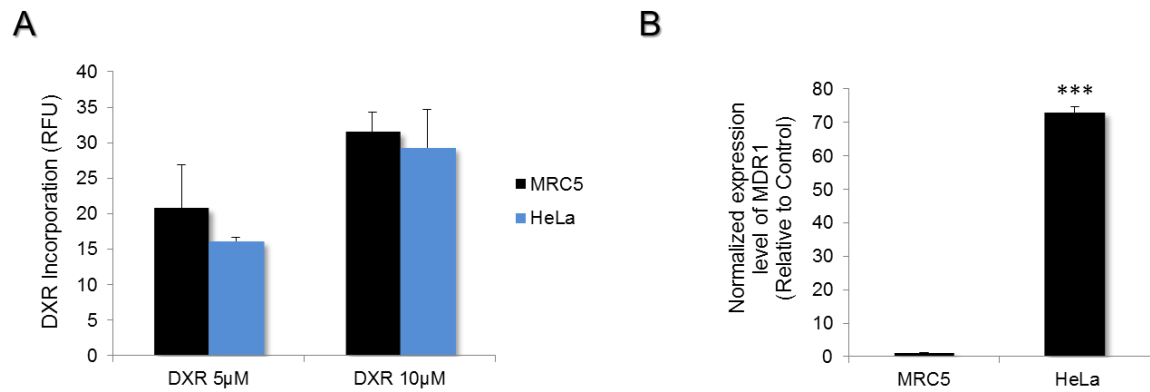

**Supplemental S1. DXR accumulation within the different cell lines is identical.** (A) The drug uptake was measured in relative fluorescence units (RFU), after 10 min of treatment with 5 or 10  $\mu$ M of DXR. The results are presented as mean values of 3 different experiments  $\pm$  SD. (B) The expression of multidrug resistance protein 1 (MDR1) was analyzed by RT-qPCR. The bars represent expression level  $\pm$  SEM, with \*\*\*,  $P < 0.0001$ .

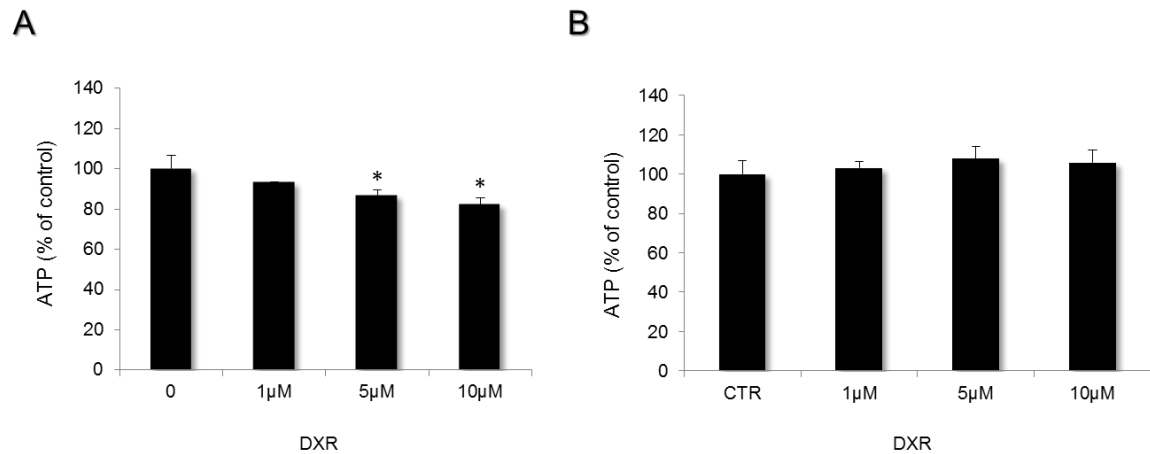

**Figure S2. DXR impairs bioenergetics of PSD-dependent cells.** The ATP content was measured in (A) HeLa and (B) MRC5 cells after 6 h of incubation with DXR at 1, 5, or 10  $\mu$ M. The data are expressed in percentage of control, as untreated cells. The bars represent mean values  $\pm$  SD with \*,  $P < 0.05$ .
